# Supplementary material for: Syntheses, crystal structures, and polymorphism of quaternary pyrrolidinium chlorides
Source: Royal Society of Chemistry journal article supplement (doi:10.1039/b718917f), 2008-01-01
Supplement: b718917f.pdf [file b718917f.pdf]

### Supplementary information

## Syntheses, crystal structures, and polymorphism of quaternary pyrrolidinium chlorides

Gerhard Laus,\* Gino Bentivoglio, Volker Kahlenberg, Ulrich J. Griesser,  
Herwig Schottenberger\* and Gerhard Nauer

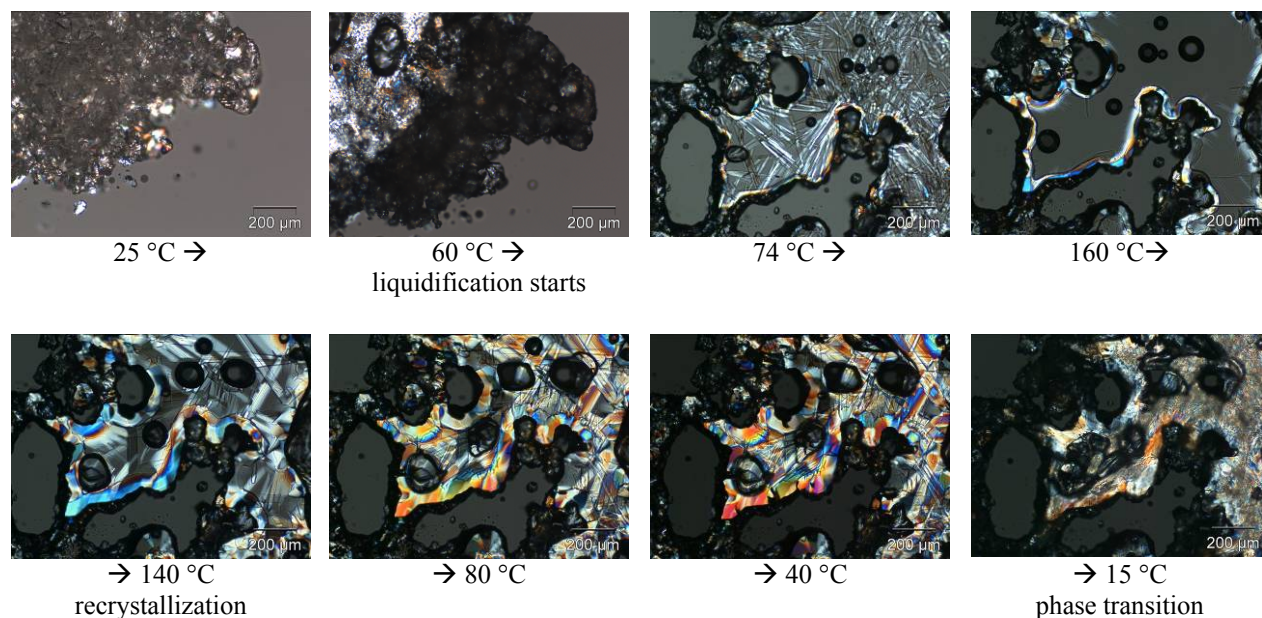

**Fig. S1** Hot stage microscopy of **1**, showing a heating cycle (upper series, arrow on the right hand) and a cooling cycle (lower series, arrow on the left hand). The starting material consists of a mixture of form A and B which liquidifies and recrystallizes to pure form B which undergoes a phase transition to form A at about 15 °C.

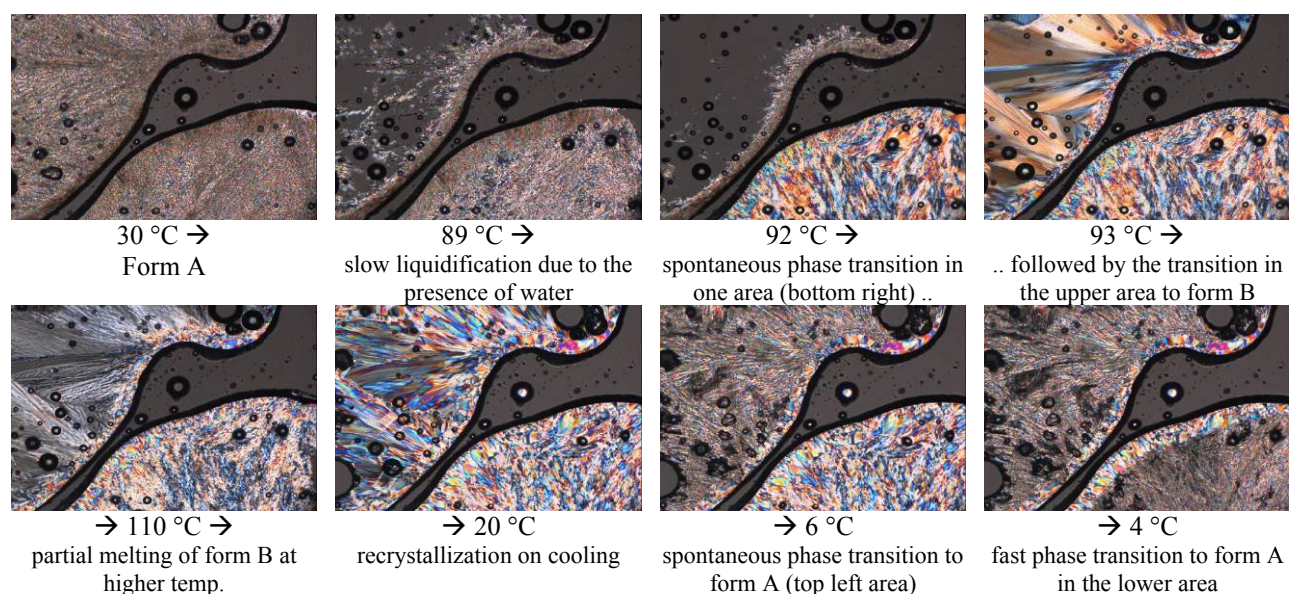

**Fig. S2** Hot stage microscopy of **2**, showing a heating cycle (upper series) and a cooling cycle (lower series). The sample was annealed at 120 °C for 20 minutes to remove some of the water and cooled to -10 °C before these pictures were taken. The cycle was started with form A and shows the endothermic transformation to form B at about 92 °C and the exothermic retransformation to form A at about 5 °C.
